# Supplementary material
Source: publisher figshare collection journal article supplement (https://acs.figshare.com/ndownloader/files/10684402)
Supplement: Supplementary file 1 [file 10684402]

Supporting Information for

**Calcium stearate as acid scavenger for  
synthesizing bromobutyl rubber at high  
concentration in a Microreactor system**

*Pei Xie<sup>†</sup>, Kai Wang<sup>†</sup> and Guangsheng Luo<sup>\*,†</sup>*

<sup>†</sup>The State Key Laboratory of Chemical Engineering, Department of Chemical Engineering,

Tsinghua University, Beijing 100084, China. E-mail: [gsluo@tsinghua.edu.cn](mailto:gsluo@tsinghua.edu.cn); Fax: (8610)

62783870; Tel.: (8610)62783870

## 1. Repeatability of $^1\text{H}$ -NMR spectra

In this work, most of the quantitative analysis is based on the  $^1\text{H}$ -NMR spectra. To ensure the accuracy of this measurement, each sample has been detected five times. Here, we randomly select five samples as evidence to evaluate the repeatability of  $^1\text{H}$ -NMR spectra. The measurement error could be shown in the following Table S1. Three parameters of the sample,  $X_{trans}$ ,  $Y_{BIIR-1}$  and  $w$ , are used for the evaluation. The results can be seen in Table S1. Obviously, this method has a good repeatability and the standard difference of these three parameters are all less than 1.5%. Then the results we get from this method is relatively accurate.

**Table S1. The measurement error of  $^1\text{H}$ -NMR spectra\***

| No. | Repetition | $X_{trans}$<br>(%) | $\mu_{trans}$<br>(%) | $SD_{trans}$<br>(%) | $Y_{BIIR-1}$<br>(%) | $\mu_{BIIR-1}$<br>(%) | $SD_{BIIR-1}$<br>(%) | $w$<br>(%) | $\mu_w$<br>(%) | $SD_w$<br>(%) |
|-----|------------|--------------------|----------------------|---------------------|---------------------|-----------------------|----------------------|------------|----------------|---------------|
| 1   | 1          | 76.89              |                      |                     | 38.05               |                       |                      | 68.32      |                |               |
|     | 2          | 76.29              |                      |                     | 36.65               |                       |                      | 66.46      |                |               |
|     | 3          | 75.30              | 76.26                | 0.78                | 37.99               | 36.98                 | 1.01                 | 68.98      | 67.86          | 1.36          |
|     | 4          | 75.67              |                      |                     | 36.50               |                       |                      | 69.17      |                |               |
|     | 5          | 77.15              |                      |                     | 35.71               |                       |                      | 66.37      |                |               |
| 2   | 1          | 30.96              |                      |                     | 24.35               |                       |                      | 87.16      |                |               |
|     | 2          | 32.06              |                      |                     | 25.03               |                       |                      | 85.98      |                |               |
|     | 3          | 32.08              | 31.78                | 0.47                | 24.10               | 24.65                 | 0.47                 | 87.63      | 86.57          | 0.79          |
|     | 4          | 31.87              |                      |                     | 24.56               |                       |                      | 86.28      |                |               |
|     | 5          | 31.92              |                      |                     | 25.23               |                       |                      | 85.81      |                |               |
| 3   | 1          | 42.45              |                      |                     | 29.80               |                       |                      | 78.30      |                |               |
|     | 2          | 42.48              |                      |                     | 31.73               |                       |                      | 79.93      |                |               |
|     | 3          | 42.98              | 42.94                | 0.48                | 33.43               | 31.65                 | 1.32                 | 76.24      | 78.01          | 1.36          |
|     | 4          | 43.56              |                      |                     | 32.05               |                       |                      | 78.22      |                |               |



|                 |      |      |      |       |       |       |       |       |
|-----------------|------|------|------|-------|-------|-------|-------|-------|
| $x_{IIR}$ (wt%) | 4.88 | 6.75 | 9.45 | 14.77 | 15.25 | 18.46 | 21.51 | 24.31 |
| $\mu$ (mPa·s)   | 4.59 | 9.68 | 35.1 | 181   | 297   | 711   | 1690  | 4340  |

\* $v_s$  is the shear rate of coaxial cylinder rheometer;  $x_{IIR}$  stands for the mass concentration of IIR;  $\mu$  represents the detected viscosity of IIR solution.

Table S2 declares that  $\mu$  varies with concentration of IIR. Especially, when  $x_{IIR}$  is less than 9.45 wt%, growth of  $\mu$  is relatively slow and  $\mu$  is always less 50 mPa·s. However, if  $x_{IIR}$  is larger than 9.45 wt%,  $\mu$  increases rapidly, even larger than 200 mPa·s at 15.25 wt%. Thus, compared with our previous 10 wt% IIR solution, 15 wt% IIR solution used in this work has a rather high viscosity.

### 3. Selectivity of BIIR-1 ( $w$ ) from different companies

Detailed data of different BIIR from different companies, for instance, ExxonMobil, Lanxess and Cenway New Materials Co. Ltd. are provided in the following Table S3.

**Table S3.** Selectivity of BIIR-1 ( $w$ ) from different companies

| Type    | Exxon<br>2222 | Exxon<br>2223 | Lanxess<br>2030 | Lanxess<br>2031 | Cenway<br>2302 | Cenway<br>2303 | Cenway<br>2309 | Cenway<br>2310 |
|---------|---------------|---------------|-----------------|-----------------|----------------|----------------|----------------|----------------|
| $w$ (%) | 92.07         | 92.61         | 95.15           | 91.30           | 93.94          | 94.21          | 89.94          | 93.72          |
